# Supplementary material for: Selection and Validation of Reference Genes for mRNA Expression by Quantitative Real-Time PCR Analysis in Neolamarckia cadamba
Source: PubMed Central journal article supplement (PMC6006177; doi:10.1038/s41598-018-27633-5), 2018-06-18
Supplement: 41598_2018_27633_MOESM1_ESM.pdf [file 41598_2018_27633_MOESM1_ESM.pdf]

# Supplementary Information

## Selection and Validation of Reference Genes for mRNA Expression by Quantitative Real-Time PCR Analysis in *Neolamarckia cadamba*

Tian Huang<sup>1, 2, §</sup>, Jian-Mei Long<sup>2, §</sup>, Si-Wen Liu<sup>1, 2</sup>, Zi-Wei Yang<sup>1, 2</sup>, Qi-Jin Zhu<sup>1, 2</sup>, Xiao-Lan Zhao<sup>2</sup>,  
Chang-Cao Peng<sup>1, 2, \*</sup>

1 State Key Laboratory for Conservation and Utilization of Subtropical Agro-bioresources, South China Agricultural University, Guangzhou 510642, China

2 Guangdong Key Laboratory for Innovative Development and Utilization of Forest Plant Germplasm, College of Forestry and Landscape Architecture, South China Agricultural University, Guangzhou 510642, China

§These authors contributed equally to this work.

\*Corresponding author

### Corresponding author:

Chang-Cao Peng

Professor

State Key Laboratory for Conservation and Utilization of Subtropical Agro-bioresources, South China Agricultural University, Guangzhou 510642, China; Guangdong Key Laboratory for Innovative Development and Utilization of Forest Plant Germplasm, College of Forestry and Landscape Architecture, South China Agricultural University, Guangzhou 510642, China

Tel number: +86-20-85280259

E-mail: ccpeng@scau.edu.cn

## Supplementary Information Description

### Supplementary Figures

**Supplementary Fig. S1** Specificity of primer pairs for qRT-qPCR amplification. 1.0% non-denaturing agarose gel electrophoresis showed amplification of a specific product of the expected size for each reference gene. M represented DNA marker. 1-15 represented *ACT1*, *ACT7*, *ACT11*, *TUA2*, *TUA4*, *TUA5*, *EF-1- $\alpha$* , *Rubisco*, *RPS25*, *RPL10A*, *MDH*, *GAPDH*, *PGK*, *SAMDC*, *F-BOX*.

**Supplementary Fig. S2** Melting curve of 15 candidate reference genes. a-o referred to *ACT1*, *ACT7*, *ACT11*, *TUA2*, *TUA4*, *TUA5*, *EF-1- $\alpha$* , *Rubisco*, *RPS25*, *RPL10A*, *MDH*, *GAPDH*, *PGK*, *SAMDC* and *F-BOX*, respectively.

### Supplementary Tables

**Supplementary Table S1** Amplicon characteristics of candidate reference genes.

**Supplementary Table S2** Stability ranking orders of candidates reference genes in six experimental sets by geNorm, NormFinder, BestKeeper and RefFinder.

**Supplementary Table S3** Five sample sets from *Neolamarckia cadamba* used in this study.

**Supplementary Table S4** Characteristics of candidate reference genes and qRT-PCR primers in *Neolamarckia cadamba*. F indicates forward primer while R represents reverse primer.

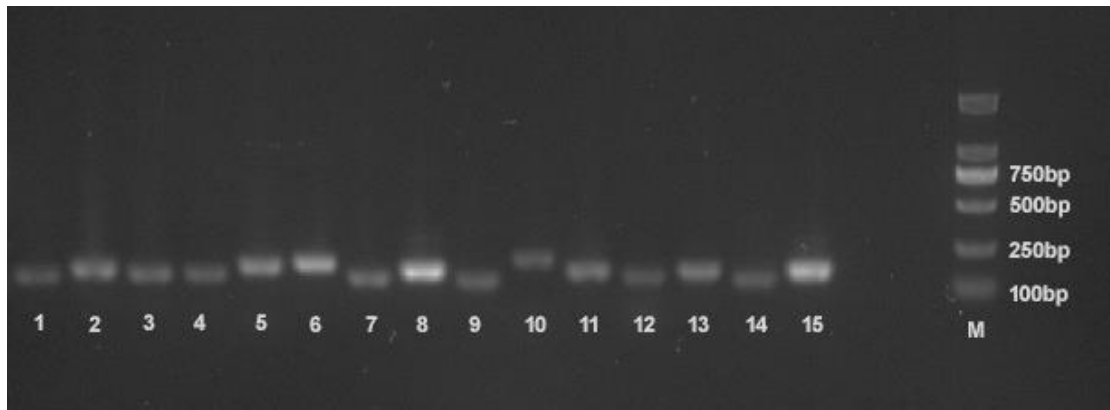

**Supplementary Fig. S1 Specificity of primer pairs for qRT-qPCR amplification.** 1.0% non-denaturing agarose gel electrophoresis showed amplification of a specific product of the expected size for each reference gene. M represented DNA marker. 1-15 represented *ACT1*, *ACT7*, *ACT11*, *TUA2*, *TUA4*, *TUA5*, *EF-1- $\alpha$* , *Rubisco*, *RPS25*, *RPL10A*, *MDH*, *GAPDH*, *PGK*, *SAMDC*, *F-BOX*.

**The raw image:**

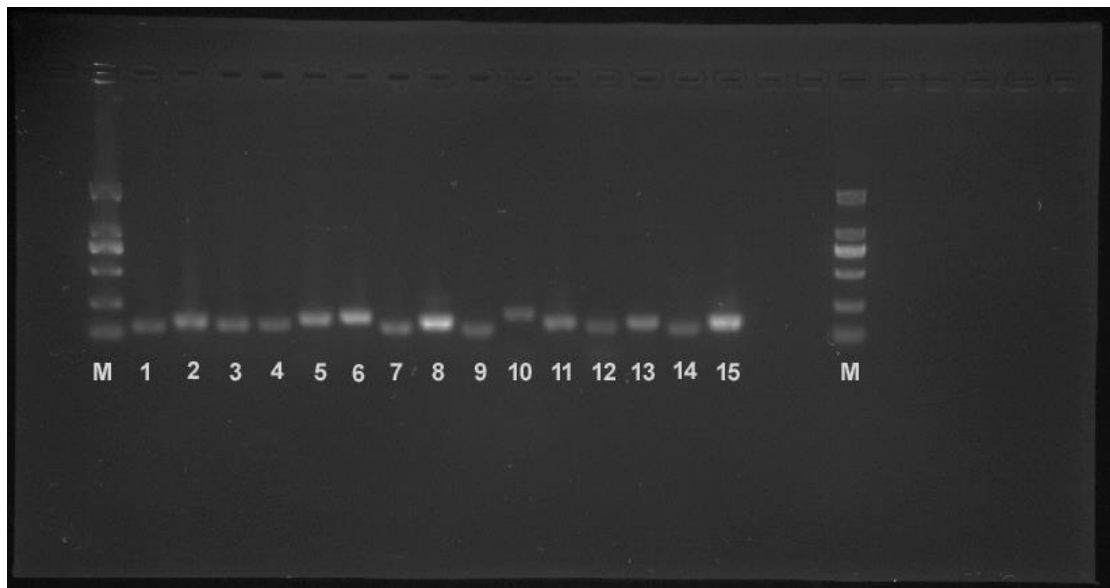

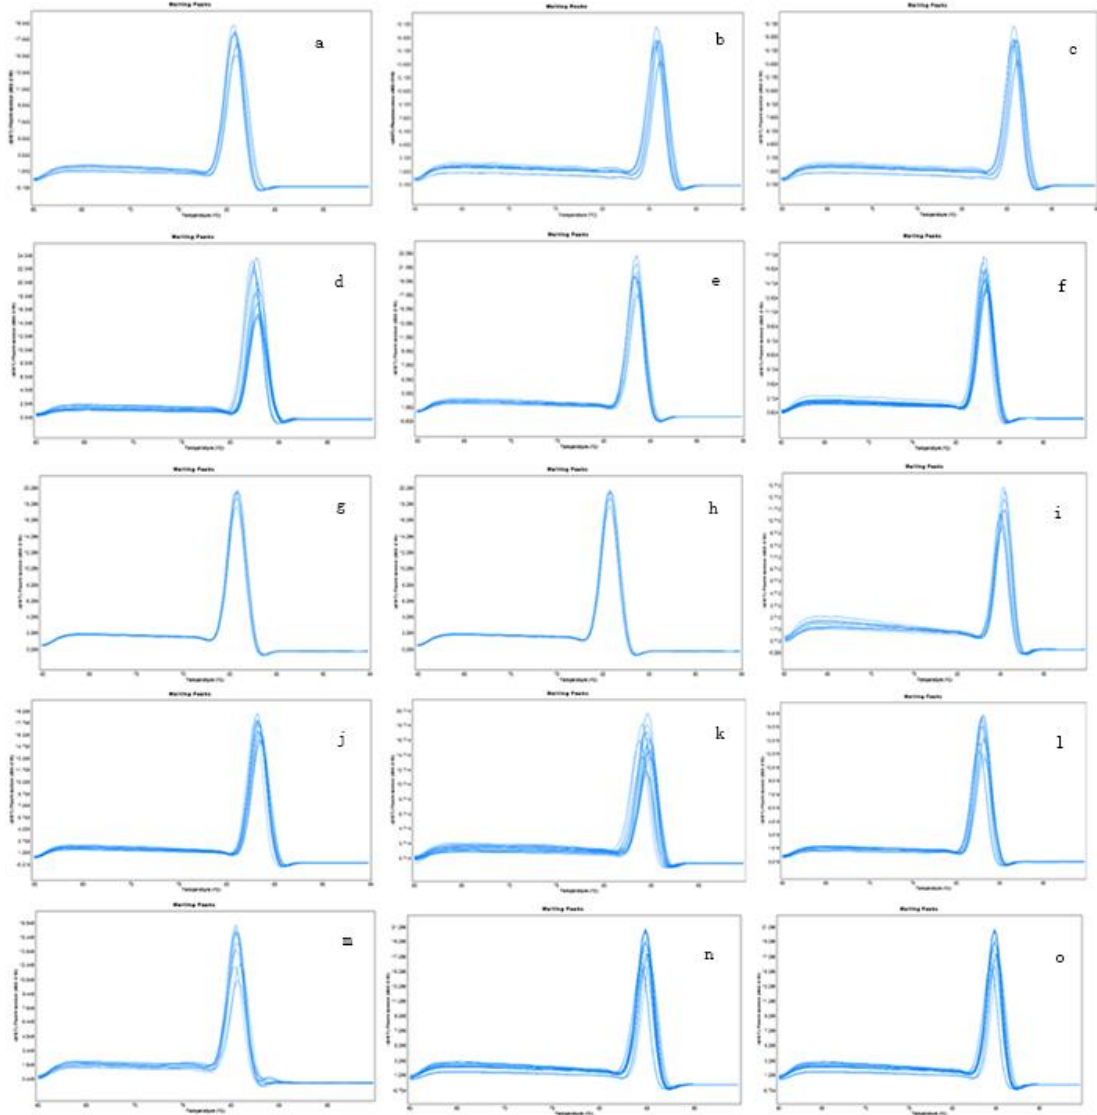

**Supplementary Fig. S2 Melting curve of 15 candidate reference genes.** a-o referred to *ACT1*, *ACT7*, *ACT11*, *TUA2*, *TUA4*, *TUA5*, *EF-1- $\alpha$* , *Rubisco*, *RPS25*, *RPL10A*, *MDH*, *GAPDH*, *PGK*, *SAMDC* and *F-BOX*, respectively.

**Supplementary Table S1 Amplicon characteristics of candidate reference genes.**

| <b>Gene symbol</b>              | <b>Linear regression equation</b> | <b>Correlation (R<sup>2</sup>)</b> | <b>Amplification efficiency (%)</b> | <b>Slope</b> |
|---------------------------------|-----------------------------------|------------------------------------|-------------------------------------|--------------|
| <i>ACT1</i>                     | $y = -3.4600x + 31.185$           | 0.9917                             | 0.945                               | -3.4600      |
| <i>ACT7</i>                     | $y = -3.2903x + 33.513$           | 0.9907                             | 1.013                               | -3.2903      |
| <i>ACT11</i>                    | $y = -3.3053x + 32.799$           | 0.9918                             | 1.007                               | -3.3053      |
| <i>TUA2</i>                     | $y = -3.2273x + 32.080$           | 0.9986                             | 1.041                               | -3.2273      |
| <i>TUA4</i>                     | $y = -3.2273x + 32.080$           | 0.9986                             | 1.041                               | -3.2273      |
| <i>TUA5</i>                     | $y = -3.3399x + 32.758$           | 0.9975                             | 0.993                               | -3.3399      |
| <i>EF-1-<math>\alpha</math></i> | $y = -3.3950x + 31.979$           | 0.9955                             | 0.970                               | -3.3950      |
| <i>Rubisco</i>                  | $y = -3.2863x + 33.577$           | 0.9902                             | 1.015                               | -3.2863      |
| <i>RPS25</i>                    | $y = -2.9840x + 32.645$           | 0.9991                             | 1.163                               | -2.9840      |
| <i>RPL10A</i>                   | $y = -3.4037x + 33.979$           | 0.9954                             | 0.967                               | -3.4037      |
| <i>MDH</i>                      | $y = -3.1153x + 32.282$           | 0.9944                             | 1.094                               | -3.1153      |
| <i>GAPDH</i>                    | $y = -3.3027x + 34.511$           | 0.9984                             | 1.008                               | -3.3027      |
| <i>PGK</i>                      | $y = -3.2188x + 31.943$           | 0.9953                             | 1.045                               | -3.2188      |
| <i>SAMDC</i>                    | $y = -3.4283x + 31.231$           | 0.9946                             | 0.957                               | -3.4283      |
| <i>F-BOX</i>                    | $y = -3.1690x + 32.654$           | 0.9936                             | 1.068                               | -3.1690      |

**Supplementary Table S2 Stability ranking orders of candidates reference genes in six experimental sets by geNorm, NormFinder, BestKeeper and RefFinder.**

| Method                                                         | Ranking order (The 1st is the most stable, and the 15th is the least stable) |               |                |               |              |                                 |                                 |                                 |                                 |                |                                 |                |                                 |                                 |                                 |
|----------------------------------------------------------------|------------------------------------------------------------------------------|---------------|----------------|---------------|--------------|---------------------------------|---------------------------------|---------------------------------|---------------------------------|----------------|---------------------------------|----------------|---------------------------------|---------------------------------|---------------------------------|
|                                                                | 1                                                                            | 2             | 3              | 4             | 5            | 6                               | 7                               | 8                               | 9                               | 10             | 11                              | 12             | 13                              | 14                              | 15                              |
| <b>(A) Ranking order in different tissues</b>                  |                                                                              |               |                |               |              |                                 |                                 |                                 |                                 |                |                                 |                |                                 |                                 |                                 |
| Genorm                                                         | <i>RPL10A / SAMDC</i>                                                        |               | <i>ACT11</i>   | <i>RPS25</i>  | <i>ACT7</i>  | <i>PGK</i>                      | <i>EF-1-<math>\alpha</math></i> | <i>ACT1</i>                     | <i>TUA5</i>                     | <i>F-BOX</i>   | <i>TUA4</i>                     | <i>GAPDH</i>   | <i>MDH</i>                      | <i>TUA2</i>                     | <i>Rubisco</i>                  |
| Normfinder                                                     | <i>RPL10A</i>                                                                | <i>ACT7</i>   | <i>SAMDC</i>   | <i>ACT11</i>  | <i>PGK</i>   | <i>RPS25</i>                    | <i>ACT1</i>                     | <i>EF-1-<math>\alpha</math></i> | <i>F-BOX</i>                    | <i>TUA4</i>    | <i>TUA5</i>                     | <i>GAPDH</i>   | <i>TUA2</i>                     | <i>MDH</i>                      | <i>Rubisco</i>                  |
| BestKeeper                                                     | <i>ACT7</i>                                                                  | <i>SAMDC</i>  | <i>RPL10A</i>  | <i>PGK</i>    | <i>ACT11</i> | <i>EF-1-<math>\alpha</math></i> | <i>TUA5</i>                     | <i>RPS25</i>                    | <i>F-BOX</i>                    | <i>ACT1</i>    | <i>TUA4</i>                     | <i>TUA2</i>    | <i>GAPDH</i>                    | <i>Rubisco</i>                  | <i>MDH</i>                      |
| RefFinder                                                      | <i>RPL10A</i>                                                                | <i>SAMDC</i>  | <i>ACT7</i>    | <i>ACT11</i>  | <i>PGK</i>   | <i>RPS25</i>                    | <i>EF-1-<math>\alpha</math></i> | <i>ACT1</i>                     | <i>F-BOX</i>                    | <i>TUA5</i>    | <i>TUA4</i>                     | <i>GAPDH</i>   | <i>TUA2</i>                     | <i>MDH</i>                      | <i>Rubisco</i>                  |
| <b>(B) Ranking order under different developmental stages</b>  |                                                                              |               |                |               |              |                                 |                                 |                                 |                                 |                |                                 |                |                                 |                                 |                                 |
| Genorm                                                         | <i>PGK / SAMDC</i>                                                           |               | <i>ACT7</i>    | <i>RPL10A</i> | <i>F-BOX</i> | <i>TUA2</i>                     | <i>Rubisco</i>                  | <i>TUA4</i>                     | <i>TUA5</i>                     | <i>MDH</i>     | <i>ACT1</i>                     | <i>RPS25</i>   | <i>GAPDH</i>                    | <i>EF-1-<math>\alpha</math></i> | <i>ACT11</i>                    |
| Normfinder                                                     | <i>F-BOX</i>                                                                 | <i>PGK</i>    | <i>SAMDC</i>   | <i>RPL10A</i> | <i>ACT7</i>  | <i>MDH</i>                      | <i>TUA4</i>                     | <i>TUA2</i>                     | <i>Rubisco</i>                  | <i>TUA5</i>    | <i>GAPDH</i>                    | <i>ACT1</i>    | <i>RPS25</i>                    | <i>EF-1-<math>\alpha</math></i> | <i>ACT11</i>                    |
| BestKeeper                                                     | <i>PGK</i>                                                                   | <i>SAMDC</i>  | <i>RPL10A</i>  | <i>ACT7</i>   | <i>TUA5</i>  | <i>TUA2</i>                     | <i>RPS25</i>                    | <i>F-BOX</i>                    | <i>MDH</i>                      | <i>TUA4</i>    | <i>EF-1-<math>\alpha</math></i> | <i>Rubisco</i> | <i>ACT11</i>                    | <i>GAPDH</i>                    | <i>ACT1</i>                     |
| RefFinder                                                      | <i>PGK</i>                                                                   | <i>SAMDC</i>  | <i>F-BOX</i>   | <i>RPL10A</i> | <i>ACT7</i>  | <i>TUA2</i>                     | <i>MDH</i>                      | <i>TUA4</i>                     | <i>TUA5</i>                     | <i>Rubisco</i> | <i>RPS25</i>                    | <i>GAPDH</i>   | <i>ACT1</i>                     | <i>EF-1-<math>\alpha</math></i> | <i>ACT11</i>                    |
| <b>(C) Ranking order under different photosynthetic cycles</b> |                                                                              |               |                |               |              |                                 |                                 |                                 |                                 |                |                                 |                |                                 |                                 |                                 |
| Genorm                                                         | <i>ACT7 / SAMDC</i>                                                          |               | <i>ACT1</i>    | <i>TUA5</i>   | <i>TUA2</i>  | <i>EF-1-<math>\alpha</math></i> | <i>RPL10A</i>                   | <i>PGK</i>                      | <i>RPS25</i>                    | <i>GAPDH</i>   | <i>ACT11</i>                    | <i>MDH</i>     | <i>F-BOX</i>                    | <i>TUA4</i>                     | <i>Rubisco</i>                  |
| Normfinder                                                     | <i>ACT7</i>                                                                  | <i>SAMDC</i>  | <i>PGK</i>     | <i>RPS25</i>  | <i>ACT1</i>  | <i>TUA5</i>                     | <i>RPL10A</i>                   | <i>TUA2</i>                     | <i>EF-1-<math>\alpha</math></i> | <i>GAPDH</i>   | <i>ACT11</i>                    | <i>MDH</i>     | <i>F-BOX</i>                    | <i>TUA4</i>                     | <i>Rubisco</i>                  |
| BestKeeper                                                     | <i>SAMDC</i>                                                                 | <i>ACT7</i>   | <i>PGK</i>     | <i>RPS25</i>  | <i>ACT1</i>  | <i>TUA5</i>                     | <i>TUA2</i>                     | <i>RPL10A</i>                   | <i>EF-1-<math>\alpha</math></i> | <i>ACT11</i>   | <i>GAPDH</i>                    | <i>MDH</i>     | <i>F-BOX</i>                    | <i>TUA4</i>                     | <i>Rubisco</i>                  |
| RefFinder                                                      | <i>SAMDC</i>                                                                 | <i>ACT7</i>   | <i>ACT1</i>    | <i>PGK</i>    | <i>TUA5</i>  | <i>RPS25</i>                    | <i>TUA2</i>                     | <i>RPL10A</i>                   | <i>EF-1-<math>\alpha</math></i> | <i>GAPDH</i>   | <i>ACT11</i>                    | <i>MDH</i>     | <i>F-BOX</i>                    | <i>TUA4</i>                     | <i>Rubisco</i>                  |
| <b>(D) Ranking order under drought stress</b>                  |                                                                              |               |                |               |              |                                 |                                 |                                 |                                 |                |                                 |                |                                 |                                 |                                 |
| Genorm                                                         | <i>RPS25 / SAMDC</i>                                                         |               | <i>TUA4</i>    | <i>GAPDH</i>  | <i>F-BOX</i> | <i>ACT11</i>                    | <i>RPL10A</i>                   | <i>ACT1</i>                     | <i>PGK</i>                      | <i>TUA5</i>    | <i>Rubisco</i>                  | <i>TUA2</i>    | <i>MDH</i>                      | <i>EF-1-<math>\alpha</math></i> | <i>ACT7</i>                     |
| Normfinder                                                     | <i>SAMDC</i>                                                                 | <i>RPL10A</i> | <i>RPS25</i>   | <i>F-BOX</i>  | <i>ACT11</i> | <i>ACT1</i>                     | <i>TUA4</i>                     | <i>GAPDH</i>                    | <i>PGK</i>                      | <i>TUA5</i>    | <i>Rubisco</i>                  | <i>TUA2</i>    | <i>EF-1-<math>\alpha</math></i> | <i>MDH</i>                      | <i>ACT7</i>                     |
| BestKeeper                                                     | <i>RPL10A</i>                                                                | <i>SAMDC</i>  | <i>RPS25</i>   | <i>ACT1</i>   | <i>ACT11</i> | <i>F-BOX</i>                    | <i>TUA5</i>                     | <i>TUA4</i>                     | <i>PGK</i>                      | <i>MDH</i>     | <i>Rubisco</i>                  | <i>TUA2</i>    | <i>ACT7</i>                     | <i>EF-1-<math>\alpha</math></i> | <i>GAPDH</i>                    |
| RefFinder                                                      | <i>SAMDC</i>                                                                 | <i>RPS25</i>  | <i>RPL10A</i>  | <i>F-BOX</i>  | <i>ACT11</i> | <i>ACT1</i>                     | <i>TUA4</i>                     | <i>GAPDH</i>                    | <i>TUA5</i>                     | <i>PGK</i>     | <i>Rubisco</i>                  | <i>TUA2</i>    | <i>MDH</i>                      | <i>EF-1-<math>\alpha</math></i> | <i>ACT7</i>                     |
| <b>(E) Ranking order under cold stress</b>                     |                                                                              |               |                |               |              |                                 |                                 |                                 |                                 |                |                                 |                |                                 |                                 |                                 |
| Genorm                                                         | <i>RPS25 / SAMDC</i>                                                         |               | <i>Rubisco</i> | <i>TUA5</i>   | <i>F-BOX</i> | <i>ACT1</i>                     | <i>PGK</i>                      | <i>GAPDH</i>                    | <i>ACT11</i>                    | <i>TUA4</i>    | <i>RPL10A</i>                   | <i>ACT7</i>    | <i>MDH</i>                      | <i>TUA2</i>                     | <i>EF-1-<math>\alpha</math></i> |
| Normfinder                                                     | <i>Rubisco</i>                                                               | <i>RPS25</i>  | <i>ACT11</i>   | <i>SAMDC</i>  | <i>GAPDH</i> | <i>TUA5</i>                     | <i>ACT1</i>                     | <i>RPL10A</i>                   | <i>PGK</i>                      | <i>F-BOX</i>   | <i>ACT7</i>                     | <i>TUA2</i>    | <i>MDH</i>                      | <i>EF-1-<math>\alpha</math></i> | <i>TUA4</i>                     |

**Continued**

|            |              |                |                |             |              |              |               |              |               |             |             |              |                                 |             |                                 |
|------------|--------------|----------------|----------------|-------------|--------------|--------------|---------------|--------------|---------------|-------------|-------------|--------------|---------------------------------|-------------|---------------------------------|
| BestKeeper | <i>RPS25</i> | <i>SAMDC</i>   | <i>Rubisco</i> | <i>TUA5</i> | <i>ACT11</i> | <i>TUA4</i>  | <i>RPL10A</i> | <i>F-BOX</i> | <i>ACT1</i>   | <i>ACT7</i> | <i>PGK</i>  | <i>GAPDH</i> | <i>EF-1-<math>\alpha</math></i> | <i>TUA2</i> | <i>MDH</i>                      |
| RefFinder  | <i>RPS25</i> | <i>Rubisco</i> | <i>SAMDC</i>   | <i>TUA5</i> | <i>ACT11</i> | <i>F-BOX</i> | <i>GAPDH</i>  | <i>ACT1</i>  | <i>RPL10A</i> | <i>PGK</i>  | <i>TUA4</i> | <i>ACT7</i>  | <i>TUA2</i>                     | <i>MDH</i>  | <i>EF-1-<math>\alpha</math></i> |

**(F) Ranking order under all samples**

|            |                      |              |               |              |               |               |                |             |              |                |                |              |              |                                 |                                 |
|------------|----------------------|--------------|---------------|--------------|---------------|---------------|----------------|-------------|--------------|----------------|----------------|--------------|--------------|---------------------------------|---------------------------------|
| Genorm     | <i>RPS25 / SAMDC</i> | <i>PGK</i>   | <i>F-BOX</i>  | <i>TUA5</i>  | <i>ACT1</i>   | <i>RPL10A</i> | <i>Rubisco</i> | <i>TUA4</i> | <i>MDH</i>   | <i>ACT11</i>   | <i>ACT7</i>    | <i>GAPDH</i> | <i>TUA2</i>  | <i>EF-1-<math>\alpha</math></i> |                                 |
| Normfinder | <i>SAMDC</i>         | <i>F-BOX</i> | <i>RPL10A</i> | <i>RPS25</i> | <i>PGK</i>    | <i>ACT1</i>   | <i>TUA5</i>    | <i>TUA4</i> | <i>ACT11</i> | <i>ACT7</i>    | <i>Rubisco</i> | <i>MDH</i>   | <i>GAPDH</i> | <i>TUA2</i>                     | <i>EF-1-<math>\alpha</math></i> |
| BestKeeper | <i>SAMDC</i>         | <i>RPS25</i> | <i>PGK</i>    | <i>F-BOX</i> | <i>TUA5</i>   | <i>ACT11</i>  | <i>RPL10A</i>  | <i>ACT1</i> | <i>TUA4</i>  | <i>Rubisco</i> | <i>MDH</i>     | <i>ACT7</i>  | <i>GAPDH</i> | <i>TUA2</i>                     | <i>EF-1-<math>\alpha</math></i> |
| RefFinder  | <i>SAMDC</i>         | <i>RPS25</i> | <i>F-BOX</i>  | <i>PGK</i>   | <i>RPL10A</i> | <i>TUA5</i>   | <i>ACT1</i>    | <i>TUA4</i> | <i>ACT11</i> | <i>Rubisco</i> | <i>MDH</i>     | <i>ACT7</i>  | <i>GAPDH</i> | <i>TUA2</i>                     | <i>EF-1-<math>\alpha</math></i> |

**Supplementary Table S3 Five sample sets from *Neolamarckia cadamba* used in this study.**

| Experimental sample sets       | Tissue type                                          | Number of treatments | Biological replicates | Sampling dates | Total number of samples (treatments * replicates * dates) |
|--------------------------------|------------------------------------------------------|----------------------|-----------------------|----------------|-----------------------------------------------------------|
| Different tissues              | Roots, young leaves,<br>Mature leaves, xylem, phloem | 1                    | 3                     | 1              | 15                                                        |
| Different developmental stages | Mature leaves                                        | 1                    | 3                     | 4              | 12                                                        |
| Different photosynthetic cycle | Mature leaves                                        | 3                    | 3                     | 1              | 9                                                         |
| Drought treatment              | Mature leaves                                        | 5                    | 3                     | 1              | 15                                                        |
| Cold treatment                 | Mature leaves                                        | 5                    | 3                     | 1              | 15                                                        |



**Supplementary Table S4 Characteristics of candidate reference genes and qRT-PCR primers in *Neolamarckia cadamba*. F represents forward primer while R represents reverse primer.**

| Gene symbol                     | GeneBank accession number (CDS) | GeneBank accession number (gDNA) | Annotation                               | Primer sequence (5'-3')                                | Amplicon length (bp) |
|---------------------------------|---------------------------------|----------------------------------|------------------------------------------|--------------------------------------------------------|----------------------|
| <i>ACT1</i>                     | KY922888                        | KY922871                         | Actin 1                                  | F:GTCAAGGCTGGGTTTGCTGGGG<br>R:CCCAACATAAGCATCTTTTGC    | 117                  |
| <i>ACT7</i>                     | KY922889                        | KY922872                         | Actin 7                                  | F:AACTGGTATTGTCCTGGATTCTGG<br>R:CGGTGAGGATCTTCATGAGATG | 104                  |
| <i>ACT11</i>                    | KY922890                        | KY922873                         | Actin 11                                 | F:TGCTAGTGGTCGTACAACGG<br>R:ATCTGTAAGATCGCGCCCAG       | 133                  |
| <i>TUA2</i>                     | KY922891                        | KY922874                         | Tubulin alpha 2                          | F:ATACCATTTGGCAAAGAGATCGT<br>R:GGACCCAAGACCAGATCCAGTG  | 131                  |
| <i>TUA4</i>                     | KY922892                        | KY922875                         | Tubulin alpha 4                          | F:CCCGTGGCCACTACAC<br>R:CAACAGGGATCCCAACC              | 149                  |
| <i>TUA5</i>                     | KY922893                        | KY922876                         | Tubulin alpha 5                          | F:CGGATGTTGTAGTGCTTTTG<br>R:TGGTTTGGAACCGGTGA '        | 180                  |
| <i>EF-1-<math>\alpha</math></i> | KY922894                        | KY922877                         | Elongation factor 1-alpha                | F:GCAACAAGATGGATGCCACCAC<br>R:GAACCCAGAGATGGGAACAAAG   | 134                  |
| <i>Rubisco</i>                  | KY922902                        | KY922879                         | Ribulose bisphosphate carboxylase        | F:GATTAGTTTTGCGGGTTCT<br>R:TTCCACCGAGACGACCAG          | 143                  |
| <i>RPS25</i>                    | KY922900                        | KY922883                         | Ribosomal protein S25                    | F:CCCTCTGTTCTTTCCGACCG<br>R:GGCTTGCATGAGATGAGACC       | 109                  |
| <i>RPL10A</i>                   | KY922901                        | KY922884                         | Ribosomal protein L10A                   | F:TGGCGTTGCCTGTCTATCAG<br>R:CCGAACCTCGTGAATCCTCC       | 176                  |
| <i>MDH</i>                      | KY922902                        | KY922885                         | Malate dehydrogenase                     | F:TATTCTTCACGGTTTTCTCTAC<br>R:GCTTCTCTTGGTATCCTCA      | 157                  |
| <i>GAPDH</i>                    | KY922898                        | KY922881                         | Glyceraldehyde-3-phosphate dehydrogenase | F:TTGTCTCAAACCGCAACCTT<br>R:TTAGCTCCGGCTTGGATGTG       | 124                  |
| <i>PGK</i>                      | KY922899                        | KY922882                         | Phosphoglycerate kinase                  | F:GGTGTCAACCCGAAGTACAG<br>R:ATTCTCCAGGAGCAGCACAC       | 153                  |
| <i>SAMDC</i>                    | KY922897                        | KY922880                         | S-adenosylmethionine decarboxylase       | F:GGGACCAACTGGATGAAA<br>R:TGTAAGGGAAGACAAAGAG          | 117                  |
| <i>F-BOX</i>                    | KY922895                        | KY922878                         | F-Box protein                            | F:CTTCCACTCCTCCCATCA<br>R:CAGACTTCATCAGTAGCAAAAAC      | 149                  |
